# Supplementary material
Source: Springer Nature journal article supplement (https://www.springermedizin.de/resource/supplementary/12936_2007_632_MOESM3_ESM.pdf/9547864)

|               |   |   |   |   |
|---------------|---|---|---|---|
| HZ            | - | + | - | - |
| D-HZ          | - | - | + | - |
| Beta-haematin | - | - | - | + |

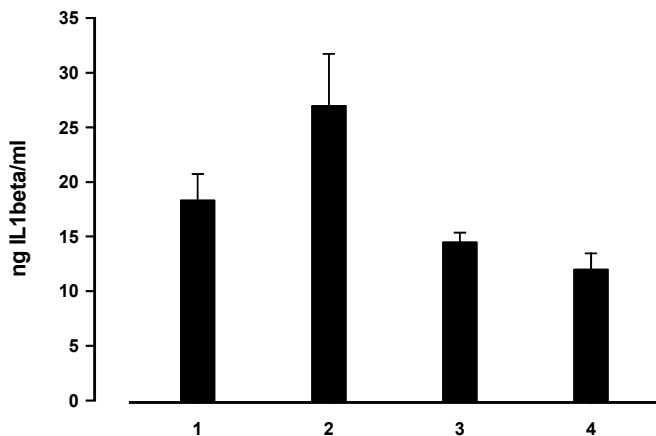

|               |   |   |   |   |
|---------------|---|---|---|---|
| HZ            | - | + | - | - |
| D-HZ          | - | - | + | - |
| Beta-haematin | - | - | - | + |

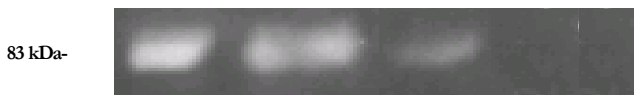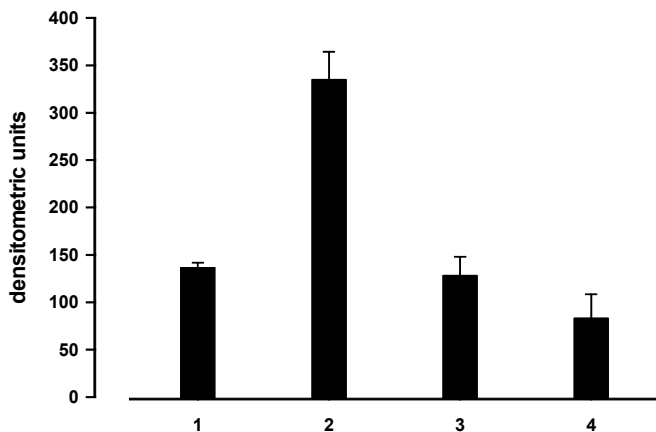

Supplement: MOESM3 [file 9547864]
